# Supplementary material
Source: PubMed Central journal article supplement (PMC6756944)
Supplement: NIHMS1535195-supplement-Acknowledgment_Permission_Form_Stroke.pdf [file NIHMS1535195-supplement-Acknowledgment_Permission_Form_Stroke.pdf]

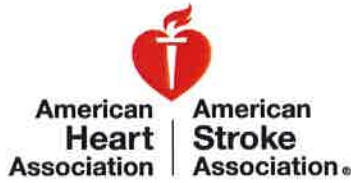

## Acknowledgment Permission Form

---

**Journal** STROKE

**Manuscript Number** STROKE/2019/025940

**First Author** Renpeng Zhou

**Title of Work**  $\beta$ -estradiol protects against acidosis-mediated and ischemic neuronal injury by promoting ASIC1a protein degradation

Authors must provide written permission/approval from all individuals mentioned by name in the Acknowledgments section of a submitted manuscript. By signing this form, any and all acknowledged persons therefore state that they have read and approved the mention of their names in the Acknowledgment section of the aforementioned paper.

|           |                     |           |                                                                                           |      |                 |
|-----------|---------------------|-----------|-------------------------------------------------------------------------------------------|------|-----------------|
| Name (1)  | <u>Veena N. Rao</u> | Signature | <u></u> | Date | <u>6/6/2019</u> |
| Name (2)  | <u></u>             | Signature | <u></u>                                                                                   | Date | <u></u>         |
| Name (3)  | <u></u>             | Signature | <u></u>                                                                                   | Date | <u></u>         |
| Name (4)  | <u></u>             | Signature | <u></u>                                                                                   | Date | <u></u>         |
| Name (5)  | <u></u>             | Signature | <u></u>                                                                                   | Date | <u></u>         |
| Name (6)  | <u></u>             | Signature | <u></u>                                                                                   | Date | <u></u>         |
| Name (7)  | <u></u>             | Signature | <u></u>                                                                                   | Date | <u></u>         |
| Name (8)  | <u></u>             | Signature | <u></u>                                                                                   | Date | <u></u>         |
| Name (9)  | <u></u>             | Signature | <u></u>                                                                                   | Date | <u></u>         |
| Name (10) | <u></u>             | Signature | <u></u>                                                                                   | Date | <u></u>         |
| Name (11) | <u></u>             | Signature | <u></u>                                                                                   | Date | <u></u>         |
| Name (12) | <u></u>             | Signature | <u></u>                                                                                   | Date | <u></u>         |
| Name (13) | <u></u>             | Signature | <u></u>                                                                                   | Date | <u></u>         |
| Name (14) | <u></u>             | Signature | <u></u>                                                                                   | Date | <u></u>         |
| Name (15) | <u></u>             | Signature | <u></u>                                                                                   | Date | <u></u>         |
| Name (16) | <u></u>             | Signature | <u></u>                                                                                   | Date | <u></u>         |
| Name (17) | <u></u>             | Signature | <u></u>                                                                                   | Date | <u></u>         |
| Name (18) | <u></u>             | Signature | <u></u>                                                                                   | Date | <u></u>         |
| Name (19) | <u></u>             | Signature | <u></u>                                                                                   | Date | <u></u>         |
| Name (20) | <u></u>             | Signature | <u></u>                                                                                   | Date | <u></u>         |
