# Supplementary material
Source: PubMed Central journal article supplement (PMC6756944)
Supplement: NIHMS1535195-supplement-Supplemental_Material.pdf [file NIHMS1535195-supplement-Supplemental_Material.pdf]

## \* Preclinical Checklist

*Preclinical Checklist: Prevention of bias is important for experimental cardiovascular research. **This short checklist must be completed, and the answers should be clearly presented in the manuscript.** The checklist will be used by reviewers and editors and it will be published. See "[Reporting Standard for Preclinical Studies of Stroke Therapy](#)" and "[Good Laboratory Practice: Preventing Introduction of Bias at the Bench](#)" for more information.*

This study involves animal models:

Yes

### Experimental groups and study timeline

The experimental group(s) have been clearly defined in the article, including number of animals in each experimental arm of the study: Yes

An account of the control group is provided, and number of animals in the control group has been reported. If no controls were used, the rationale has been stated: Yes

An overall study timeline is provided: Yes

### Inclusion and exclusion criteria

A priori inclusion and exclusion criteria for tested animals were defined and have been reported in the article: Yes

### Randomization

Animals were randomly assigned to the experimental groups. If the work being submitted does not contain multiple experimental groups, or if random assignment was not used, adequate explanations have been provided: Yes

Type and methods of randomization have been described: Yes

Methods used for allocation concealment have been reported: N/A

### Blinding

Blinding procedures have been described with regard to masking of group/treatment assignment from the experimenter. The rationale for nonblinding of the experimenter has been provided, if such was not feasible: Yes

Blinding procedures have been described with regard to masking of group assignment during outcome assessment: N/A

### Sample size and power calculations

Formal sample size and power calculations were conducted based on a priori determined outcome(s) and treatment effect, and the data have been reported. A formal size assessment was not conducted and a rationale has been provided: Yes

### Data reporting and statistical methods

Number of animals in each group: randomized, tested, lost to follow-up, or died have been reported. If the experimentation involves repeated measurements, the number of animals assessed at each time point is provided, for all experimental groups: Yes

Baseline data on assessed outcome(s) for all experimental groups have been reported: Yes

Details on important adverse events and death of animals during the course of experimentation have been provided, for all experimental arms: N/A

Statistical methods used have been reported: Yes

Numeric data on outcomes have been provided in text, or in a tabular format with the main article or as supplementary tables, in addition to the figures: Yes

### Experimental details, ethics, and funding statements

Details on experimentation including stroke model, formulation and dosage of therapeutic agent, site and route of administration, use of anesthesia and analgesia, temperature control during experimentation, and postprocedural monitoring have been described: Yes

Different sex animals have been used. If not, the reason/justification is provided: Yes

Statements on approval by ethics boards and ethical conduct of studies have been provided: Yes

Statements on funding and conflicts of interests have been provided: Yes

---

Date completed: 07/03/2019 13:36:06

User pid: 47473
